# Supplementary material for: Analysis of Game Performance Indicators during 2015–2019 World Padel Tour Seasons and Their Influence on Match Outcome
Source: MDPI journal article supplement (doi:10.3390/ijerph18094904), 2021-05-04
Supplement: s1 [file s1]

| Season | Tournament            | Number of Matches per phase<br>(Nº Male + Nº Female) | Number of Sets<br>(Nº Male + Nº Female) | Links                                                                                                                                                                                                                                                              |
|--------|-----------------------|------------------------------------------------------|-----------------------------------------|--------------------------------------------------------------------------------------------------------------------------------------------------------------------------------------------------------------------------------------------------------------------|
| 2016   | WPT Valencia Master   | 6 Quarter Finals (4M+2F)                             | 12 (8M+4F)                              | <a href="https://www.youtube.com/watch?v=c38xiUr2EOk&amp;t=12022s">https://www.youtube.com/watch?v=c38xiUr2EOk&amp;t=12022s</a><br><a href="https://www.youtube.com/watch?v=4RYoJ7FcmVw&amp;t=14178s">https://www.youtube.com/watch?v=4RYoJ7FcmVw&amp;t=14178s</a> |
|        |                       | 4 Semi Finals (2M+2F)                                | 8 (4M+4F)                               | <a href="https://www.youtube.com/watch?v=9wC7B19eJ7Q">https://www.youtube.com/watch?v=9wC7B19eJ7Q</a><br><a href="https://www.youtube.com/watch?v=MwZz24EQr0g">https://www.youtube.com/watch?v=MwZz24EQr0g</a>                                                     |
|        |                       | 1 Final (1F)                                         | 1 (1F)                                  | <a href="https://www.youtube.com/watch?v=OsThkyCLfR8&amp;t=8356s">https://www.youtube.com/watch?v=OsThkyCLfR8&amp;t=8356s</a>                                                                                                                                      |
|        | WPT Barcelona Master  | 6 Quarter Finals (4M+2F)                             | 11 (7M+4F)                              | <a href="https://www.youtube.com/watch?v=R7M_zUn19DU&amp;t=3276s">https://www.youtube.com/watch?v=R7M_zUn19DU&amp;t=3276s</a>                                                                                                                                      |
|        |                       | 3 Semi Finals (2M+1F)                                | 7 (5M+2F)                               | <a href="https://www.youtube.com/watch?v=xEO1R16PeyA">https://www.youtube.com/watch?v=xEO1R16PeyA</a><br><a href="https://www.youtube.com/watch?v=97TZsF5dTyA">https://www.youtube.com/watch?v=97TZsF5dTyA</a>                                                     |
|        |                       | 2 Finals (1M+1F)                                     | 5 (2M+3F)                               | <a href="https://www.youtube.com/watch?v=qmLMlIaFP9uY&amp;t=9462s">https://www.youtube.com/watch?v=qmLMlIaFP9uY&amp;t=9462s</a><br><a href="https://www.youtube.com/watch?v=IE_kx7Z1_ig">https://www.youtube.com/watch?v=IE_kx7Z1_ig</a>                           |
|        | WPT Las Rozas Open    | 4 Quarter Finals (4M)                                | 8 (8M)                                  | <a href="https://www.youtube.com/watch?v=0RkuhnqxbzY">https://www.youtube.com/watch?v=0RkuhnqxbzY</a>                                                                                                                                                              |
|        |                       | 4 Semi Finals (2M+2F)                                | 8 (3M+5F)                               | <a href="https://www.youtube.com/watch?v=s6sfQtgV0ew&amp;t=14798s">https://www.youtube.com/watch?v=s6sfQtgV0ew&amp;t=14798s</a><br><a href="https://www.youtube.com/watch?v=Q0aCrA8zalc">https://www.youtube.com/watch?v=Q0aCrA8zalc</a>                           |
|        |                       | 2 Finals (1M+1F)                                     | 5 (2M+3F)                               | <a href="https://www.youtube.com/watch?v=hDB88zGxjyA">https://www.youtube.com/watch?v=hDB88zGxjyA</a><br><a href="https://www.youtube.com/watch?v=-3iP54IcAYE&amp;t=5773s">https://www.youtube.com/watch?v=-3iP54IcAYE&amp;t=5773s</a>                             |
|        | WPT Mallorca Open     | 4 Quarter Finals (4M)                                | 9 (9M)                                  | <a href="https://www.youtube.com/watch?v=cIX1Eg5M2h0&amp;t=4745s">https://www.youtube.com/watch?v=cIX1Eg5M2h0&amp;t=4745s</a>                                                                                                                                      |
|        |                       | 2 Semi Finals (2F)                                   | 4 (4F)                                  | <a href="https://www.youtube.com/watch?v=MFV3ea69W9I">https://www.youtube.com/watch?v=MFV3ea69W9I</a>                                                                                                                                                              |
|        |                       | 1 Final (1F)                                         | 3 (3F)                                  | <a href="https://www.youtube.com/watch?v=j-g52b_Ximk">https://www.youtube.com/watch?v=j-g52b_Ximk</a>                                                                                                                                                              |
|        | WPT Valladolid Open   | 4 Quarter Finals (4M)                                | 8 (8M)                                  | <a href="https://www.youtube.com/watch?v=hmlj3_s7nG8&amp;t=27767s">https://www.youtube.com/watch?v=hmlj3_s7nG8&amp;t=27767s</a>                                                                                                                                    |
|        |                       | 4 Semi Finals (2M+2F)                                | 9 (5M+4F)                               | <a href="https://www.youtube.com/watch?v=OobKY2O-wdo">https://www.youtube.com/watch?v=OobKY2O-wdo</a><br><a href="https://www.youtube.com/watch?v=S0AWq175seQ&amp;t=15050s">https://www.youtube.com/watch?v=S0AWq175seQ&amp;t=15050s</a>                           |
|        |                       | 2 Finals (1M+1F)                                     | 3 (1M+2F)                               | <a href="https://www.youtube.com/watch?v=ZrPI4qFj1Cc&amp;t=3868s">https://www.youtube.com/watch?v=ZrPI4qFj1Cc&amp;t=3868s</a><br><a href="https://www.youtube.com/watch?v=Vka2YyFl030&amp;t=8042s">https://www.youtube.com/watch?v=Vka2YyFl030&amp;t=8042s</a>     |
|        | WPT Gran Canaria Open | 4 Quarter Finals (4M)                                | 8 (8M)                                  | <a href="https://www.youtube.com/watch?v=B8vF1_ohWEw">https://www.youtube.com/watch?v=B8vF1_ohWEw</a>                                                                                                                                                              |
|        |                       | 2 Semi Finals (2M)                                   | 4 (4M)                                  | <a href="https://www.youtube.com/watch?v=EDtniFF_Rgs">https://www.youtube.com/watch?v=EDtniFF_Rgs</a>                                                                                                                                                              |
|        |                       | 1 Final (1M)                                         | 2 (2M)                                  | <a href="https://www.youtube.com/watch?v=GZXYbGN9Ofg&amp;t=6144s">https://www.youtube.com/watch?v=GZXYbGN9Ofg&amp;t=6144s</a>                                                                                                                                      |
|        | WPT La nucia Open     | 4 Quarter Finals (4M)                                | 9 (9M)                                  | <a href="https://www.youtube.com/watch?v=xrzlb0or4lc">https://www.youtube.com/watch?v=xrzlb0or4lc</a>                                                                                                                                                              |
|        |                       | 2 Semi Finals (2M)                                   | 3 (3M)                                  | <a href="https://www.youtube.com/watch?v=YJzLcii9ZJU">https://www.youtube.com/watch?v=YJzLcii9ZJU</a>                                                                                                                                                              |

|  |                        |                          |            |                                                                                                                                                                                                                                                                  |
|--|------------------------|--------------------------|------------|------------------------------------------------------------------------------------------------------------------------------------------------------------------------------------------------------------------------------------------------------------------|
|  | WPT Monte-carlo Master | 1 Final (1F)             | 1 (1F)     | <a href="https://www.youtube.com/watch?v=JTcWIOV5uKg&amp;t=9064s">https://www.youtube.com/watch?v=JTcWIOV5uKg&amp;t=9064s</a>                                                                                                                                    |
|  |                        | 4 Quarter Finals (4M)    | 8 (8M)     | <a href="https://www.youtube.com/watch?v=_j1x0tZ76KU&amp;t=26874s">https://www.youtube.com/watch?v=_j1x0tZ76KU&amp;t=26874s</a>                                                                                                                                  |
|  |                        | 4 Semi Finals (2M+2F)    | 7 (3M+4F)  | <a href="https://www.youtube.com/watch?v=TtRjGCL89bE">https://www.youtube.com/watch?v=TtRjGCL89bE</a><br><a href="https://www.youtube.com/watch?v=ORxIYoh_cb4">https://www.youtube.com/watch?v=ORxIYoh_cb4</a>                                                   |
|  |                        | 2 Finals (1M+1F)         | 4 (2M+2F)  | <a href="https://www.youtube.com/watch?v=Btn_eqqYMKM">https://www.youtube.com/watch?v=Btn_eqqYMKM</a><br><a href="https://www.youtube.com/watch?v=LG2wfyagVZw&amp;t=6319s">https://www.youtube.com/watch?v=LG2wfyagVZw&amp;t=6319s</a>                           |
|  | WPT Sevilla Open       | 6 Quarter Finals (4M+2F) | 10 (7M+3F) | <a href="https://www.youtube.com/watch?v=ggxCYndjegg">https://www.youtube.com/watch?v=ggxCYndjegg</a><br><a href="https://www.youtube.com/watch?v=5FeWl_slor8">https://www.youtube.com/watch?v=5FeWl_slor8</a>                                                   |
|  |                        | 4 Semi Finals (2M+2F)    | 7 (4M+3F)  | <a href="https://www.youtube.com/watch?v=-cdp9Zo51bE">https://www.youtube.com/watch?v=-cdp9Zo51bE</a><br><a href="https://www.youtube.com/watch?v=BCSMQ8_Y6Uk">https://www.youtube.com/watch?v=BCSMQ8_Y6Uk</a>                                                   |
|  |                        | 2 Finals (1M+1F)         | 4 (2M+2F)  | <a href="https://www.youtube.com/watch?v=S1O2GE1m_iQ&amp;t=6589s">https://www.youtube.com/watch?v=S1O2GE1m_iQ&amp;t=6589s</a><br><a href="https://www.youtube.com/watch?v=ngBd7KlQbR8&amp;t=5674s">https://www.youtube.com/watch?v=ngBd7KlQbR8&amp;t=5674s</a>   |
|  | WPT A Coruña Open      | 6 Quarter Finals (4M+2F) | 14 (9M+5F) | <a href="https://www.youtube.com/watch?v=eF8_Q3vIXP0&amp;t=17166s">https://www.youtube.com/watch?v=eF8_Q3vIXP0&amp;t=17166s</a><br><a href="https://www.youtube.com/watch?v=GKCp4np_6_o">https://www.youtube.com/watch?v=GKCp4np_6_o</a>                         |
|  |                        | 4 Semi Finals (2M+2F)    | 8 (4M+4F)  | <a href="https://www.youtube.com/watch?v=ynAIj0s09wE">https://www.youtube.com/watch?v=ynAIj0s09wE</a><br><a href="https://www.youtube.com/watch?v=oPtKKk53Vv0">https://www.youtube.com/watch?v=oPtKKk53Vv0</a>                                                   |
|  |                        | 2 Finals (1M+1F)         | 4 (2M+2F)  | <a href="https://www.youtube.com/watch?v=t-cMeIdqkAI&amp;t=11314s">https://www.youtube.com/watch?v=t-cMeIdqkAI&amp;t=11314s</a><br><a href="https://www.youtube.com/watch?v=1muumO2Yp6A&amp;t=8618s">https://www.youtube.com/watch?v=1muumO2Yp6A&amp;t=8618s</a> |
|  | WPT Zaragoza Open      | 6 Quarter Finals (4M+2F) | 13 (8M+5F) | <a href="https://www.youtube.com/watch?v=UUcjgMo7Yg">https://www.youtube.com/watch?v=UUcjgMo7Yg</a><br><a href="https://www.youtube.com/watch?v=SfDl0KmMxvM">https://www.youtube.com/watch?v=SfDl0KmMxvM</a>                                                     |
|  |                        | 4 Semi Finals (2M+2F)    | 7 (4M+3F)  | <a href="https://www.youtube.com/watch?v=Q8_nD59ZFkE">https://www.youtube.com/watch?v=Q8_nD59ZFkE</a><br><a href="https://www.youtube.com/watch?v=60jeXRiYvZU">https://www.youtube.com/watch?v=60jeXRiYvZU</a>                                                   |
|  |                        | 2 Finals (1M+1F)         | 4 (2M+2F)  | <a href="https://www.youtube.com/watch?v=WVsdzIP6bJo&amp;t=7427s">https://www.youtube.com/watch?v=WVsdzIP6bJo&amp;t=7427s</a><br><a href="https://www.youtube.com/watch?v=0OblAALesCY&amp;t=4858s">https://www.youtube.com/watch?v=0OblAALesCY&amp;t=4858s</a>   |
|  | WPT Euskadi Open       | 5 Quarter Finals (3M+2F) | 10 (5M+5F) | <a href="https://www.youtube.com/watch?v=AS6LLZhNUCI&amp;t=2332s">https://www.youtube.com/watch?v=AS6LLZhNUCI&amp;t=2332s</a><br><a href="https://www.youtube.com/watch?v=XTLhY78A1gw">https://www.youtube.com/watch?v=XTLhY78A1gw</a>                           |
|  |                        | 4 Semi Finals (2M+2F)    | 9 (5M+4F)  | <a href="https://www.youtube.com/watch?v=4B6cy1OwyVY">https://www.youtube.com/watch?v=4B6cy1OwyVY</a><br><a href="https://www.youtube.com/watch?v=XQX2iS2OCgg">https://www.youtube.com/watch?v=XQX2iS2OCgg</a>                                                   |
|  |                        | 2 Finals (1M+1F)         | 4 (2M+2F)  | <a href="https://www.youtube.com/watch?v=iI-tjbqK040&amp;t=7706s">https://www.youtube.com/watch?v=iI-tjbqK040&amp;t=7706s</a><br><a href="https://www.youtube.com/watch?v=Qrhb27qTxoo&amp;t=6153s">https://www.youtube.com/watch?v=Qrhb27qTxoo&amp;t=6153s</a>   |

|      |                         |                          |             |                                                                                                                                                                                                                                                                                                                                                                                                                                  |
|------|-------------------------|--------------------------|-------------|----------------------------------------------------------------------------------------------------------------------------------------------------------------------------------------------------------------------------------------------------------------------------------------------------------------------------------------------------------------------------------------------------------------------------------|
|      | WPT Master Final Madrid | 5 Quarter Finals (3M+2F) | 9 (5M+4F)   | <a href="https://www.youtube.com/watch?v=dx4KrDqI7pk">https://www.youtube.com/watch?v=dx4KrDqI7pk</a><br><a href="https://www.youtube.com/watch?v=IDVKNk_uuiU&amp;t=11071s">https://www.youtube.com/watch?v=IDVKNk_uuiU&amp;t=11071s</a>                                                                                                                                                                                         |
|      |                         | 3 Semi Finals (1M+2F)    | 5 (2M+3F)   | <a href="https://www.youtube.com/watch?v=IG6H58oN1KA&amp;t=2501s">https://www.youtube.com/watch?v=IG6H58oN1KA&amp;t=2501s</a><br><a href="https://www.youtube.com/watch?v=rWvkwBET5fA">https://www.youtube.com/watch?v=rWvkwBET5fA</a>                                                                                                                                                                                           |
|      |                         | 2 Finals (1M+1F)         | 3 (2M+1F)   | <a href="https://www.youtube.com/watch?v=SyWaBvW07JE">https://www.youtube.com/watch?v=SyWaBvW07JE</a><br><a href="https://www.youtube.com/watch?v=-nPg0dVFPxs">https://www.youtube.com/watch?v=-nPg0dVFPxs</a>                                                                                                                                                                                                                   |
| 2017 | WPT Santander Open      | 6 Quarter Finals (4M+2F) | 12 (8M+4F)  | <a href="https://www.youtube.com/watch?v=Yd_w5BCJ3Z4">https://www.youtube.com/watch?v=Yd_w5BCJ3Z4</a><br><a href="https://www.youtube.com/watch?v=X_GvZzBaitI">https://www.youtube.com/watch?v=X_GvZzBaitI</a>                                                                                                                                                                                                                   |
|      |                         | 4 Semi Finals (2M+2F)    | 8 (4M+4F)   | <a href="https://www.youtube.com/watch?v=fLNH5jNEIA4">https://www.youtube.com/watch?v=fLNH5jNEIA4</a><br><a href="https://www.youtube.com/watch?v=QPvcbRvjKQg">https://www.youtube.com/watch?v=QPvcbRvjKQg</a>                                                                                                                                                                                                                   |
|      |                         | 2 Finals (1M+1F)         | 4 (3M+1F)   | <a href="https://www.youtube.com/watch?v=6RoE7Tn78w0">https://www.youtube.com/watch?v=6RoE7Tn78w0</a>                                                                                                                                                                                                                                                                                                                            |
|      | WPT A Coruña Open       | 6 Quarter Finals (4M+2F) | 13 (10M+3F) | <a href="https://www.youtube.com/watch?v=kOCfskJk5A4&amp;t=19s">https://www.youtube.com/watch?v=kOCfskJk5A4&amp;t=19s</a><br><a href="https://www.youtube.com/watch?v=RR6JsQE3YP4&amp;t=9s">https://www.youtube.com/watch?v=RR6JsQE3YP4&amp;t=9s</a>                                                                                                                                                                             |
|      |                         | 4 Semi Finals (2M+2F)    | 8 (4M+4F)   | <a href="https://www.youtube.com/watch?v=ghT455aW5j0">https://www.youtube.com/watch?v=ghT455aW5j0</a><br><a href="https://www.youtube.com/watch?v=_Pt-4xIJL94&amp;t=11s">https://www.youtube.com/watch?v=_Pt-4xIJL94&amp;t=11s</a>                                                                                                                                                                                               |
|      | WPT Barcelona master    | 5 Quarter Finals (3M+2F) | 10 (7M+3F)  | <a href="https://www.youtube.com/watch?v=3EGKDtR3__E">https://www.youtube.com/watch?v=3EGKDtR3__E</a>                                                                                                                                                                                                                                                                                                                            |
|      |                         | 2 Semi Finals (1M+1F)    | 3 (1M+2F)   | <a href="https://www.youtube.com/watch?v=00c9cDq8H7c">https://www.youtube.com/watch?v=00c9cDq8H7c</a>                                                                                                                                                                                                                                                                                                                            |
|      |                         | 2 Finals (1M+1F)         | 5 (2M+3F)   | <a href="https://www.youtube.com/watch?v=MKxmCbh-_8">https://www.youtube.com/watch?v=MKxmCbh-_8</a><br><a href="https://www.youtube.com/watch?v=ypqZKh8AZoo">https://www.youtube.com/watch?v=ypqZKh8AZoo</a>                                                                                                                                                                                                                     |
|      | WPT Valladolid Open     | 6 Quarter Finals (4M+2F) | 14 (10M+4F) | <a href="https://www.youtube.com/watch?v=d8BL3iiniZw">https://www.youtube.com/watch?v=d8BL3iiniZw</a><br><a href="https://www.youtube.com/watch?v=cj1jvwPRvvk">https://www.youtube.com/watch?v=cj1jvwPRvvk</a>                                                                                                                                                                                                                   |
|      |                         | 4 Semi Finals (2M+2F)    | 7 (3M+4F)   | <a href="https://www.youtube.com/watch?v=N7RApRuI4mw">https://www.youtube.com/watch?v=N7RApRuI4mw</a><br><a href="https://www.youtube.com/watch?v=GINdKV2AZVY">https://www.youtube.com/watch?v=GINdKV2AZVY</a><br><a href="https://www.youtube.com/watch?v=ZR-yJiRs1BQ">https://www.youtube.com/watch?v=ZR-yJiRs1BQ</a><br><a href="https://www.youtube.com/watch?v=VRfKzT54dkw">https://www.youtube.com/watch?v=VRfKzT54dkw</a> |
|      |                         |                          |             |                                                                                                                                                                                                                                                                                                                                                                                                                                  |
|      | WPT Mijas Open          | 6 Quarter Finals (4M+2F) | 12 (7M+5F)  | <a href="https://www.youtube.com/watch?v=Hey5heciofA">https://www.youtube.com/watch?v=Hey5heciofA</a><br><a href="https://www.youtube.com/watch?v=QPDttoaToAk">https://www.youtube.com/watch?v=QPDttoaToAk</a>                                                                                                                                                                                                                   |
|      |                         | 4 Semi Finals (2M+2F)    | 9 (5M+4F)   | <a href="https://www.youtube.com/watch?v=jnEsu57dauk">https://www.youtube.com/watch?v=jnEsu57dauk</a><br><a href="https://www.youtube.com/watch?v=AmfCsx7vM2w">https://www.youtube.com/watch?v=AmfCsx7vM2w</a><br><a href="https://www.youtube.com/watch?v=HsIvYAttGs">https://www.youtube.com/watch?v=HsIvYAttGs</a>                                                                                                            |

|  |                       |                          |            |                                                                                                                                                                                                                                          |
|--|-----------------------|--------------------------|------------|------------------------------------------------------------------------------------------------------------------------------------------------------------------------------------------------------------------------------------------|
|  |                       |                          |            | <a href="https://www.youtube.com/watch?v=iZXCAPPvdxA">https://www.youtube.com/watch?v=iZXCAPPvdxA</a>                                                                                                                                    |
|  |                       | 2 Finals (1M+1F)         | 4 (3M+1F)  | <a href="https://www.youtube.com/watch?v=anlfTEG0sHM&amp;t=3636s">https://www.youtube.com/watch?v=anlfTEG0sHM&amp;t=3636s</a><br><a href="https://www.youtube.com/watch?v=sDgpnvNNLOHI">https://www.youtube.com/watch?v=sDgpnvNNLOHI</a> |
|  |                       |                          |            |                                                                                                                                                                                                                                          |
|  | WPT Gran Canaria Open | 4 Quarter Finals (4M)    | 6 (6M)     | <a href="https://www.youtube.com/watch?v=6qvGwNRaoQ0">https://www.youtube.com/watch?v=6qvGwNRaoQ0</a>                                                                                                                                    |
|  |                       | 1 Semi Finals (1M)       | 1 (1M)     | <a href="https://www.youtube.com/watch?v=m2WwAJ8DU0E">https://www.youtube.com/watch?v=m2WwAJ8DU0E</a>                                                                                                                                    |
|  |                       | 1 Final (1M)             | 2 (2M)     | <a href="https://www.youtube.com/watch?v=O8Q3xAIEZPs">https://www.youtube.com/watch?v=O8Q3xAIEZPs</a>                                                                                                                                    |
|  | WPT Alicante Open     | 6 Quarter Finals (4M+2F) | 13 (9M+4F) | <a href="https://www.youtube.com/watch?v=AozIo_IPvrE">https://www.youtube.com/watch?v=AozIo_IPvrE</a><br><a href="https://www.youtube.com/watch?v=k_CIB2vTKdg">https://www.youtube.com/watch?v=k_CIB2vTKdg</a>                           |
|  |                       | 4 Semi Finals (2M+2F)    | 9 (5M+4F)  | <a href="https://www.youtube.com/watch?v=3-PQkuIG1GU">https://www.youtube.com/watch?v=3-PQkuIG1GU</a><br><a href="https://www.youtube.com/watch?v=LDHvU2pelBA">https://www.youtube.com/watch?v=LDHvU2pelBA</a>                           |
|  |                       | 2 Final (1M+1F)          | 4 (3M+1F)  | <a href="https://www.youtube.com/watch?v=fVycCNvgFJ8">https://www.youtube.com/watch?v=fVycCNvgFJ8</a>                                                                                                                                    |
|  | WPT Sevilla Open      | 6 Quarter Finals (4M+2F) | 13 (8M+5F) | <a href="https://www.youtube.com/watch?v=_jtbSEYs6-k">https://www.youtube.com/watch?v=_jtbSEYs6-k</a><br><a href="https://www.youtube.com/watch?v=xhAS0JMgba8">https://www.youtube.com/watch?v=xhAS0JMgba8</a>                           |
|  |                       | 4 Semi Finals (2M+2F)    | 6 (3M+3F)  | <a href="https://www.youtube.com/watch?v=Fwkn45aYZQU">https://www.youtube.com/watch?v=Fwkn45aYZQU</a><br><a href="https://www.youtube.com/watch?v=1DEZ95h99vA">https://www.youtube.com/watch?v=1DEZ95h99vA</a>                           |
|  |                       | 2 Final (1M+1F)          | 4 (2M+2F)  | <a href="https://www.youtube.com/watch?v=Wc9ZZMdtD7w">https://www.youtube.com/watch?v=Wc9ZZMdtD7w</a>                                                                                                                                    |
|  | WPT Andorra Open      | 4 Quarter Finals (4M)    | 7 (7M)     | <a href="https://www.youtube.com/watch?v=ESy5vdrq43E">https://www.youtube.com/watch?v=ESy5vdrq43E</a>                                                                                                                                    |
|  |                       | 2 Semi Finals (2M)       | 6 (6M)     | <a href="https://www.youtube.com/watch?v=V8YTFjxCiu8">https://www.youtube.com/watch?v=V8YTFjxCiu8</a><br><a href="https://www.youtube.com/watch?v=M8chVj4nD_A">https://www.youtube.com/watch?v=M8chVj4nD_A</a>                           |
|  |                       | 1 Final (1F)             | 2 (2F)     | <a href="https://www.youtube.com/watch?v=V8YTFjxCiu8">https://www.youtube.com/watch?v=V8YTFjxCiu8</a>                                                                                                                                    |
|  | WPT Granada Open      | 6 Quarter Finals (4M+2F) | 13 (9M+4F) | <a href="https://www.youtube.com/watch?v=d2HcEN663pM">https://www.youtube.com/watch?v=d2HcEN663pM</a><br><a href="https://www.youtube.com/watch?v=FOwChpryRBg">https://www.youtube.com/watch?v=FOwChpryRBg</a>                           |
|  |                       | 4 Semi Finals (2M+2F)    | 8 (5M+3F)  | <a href="https://www.youtube.com/watch?v=Fbml7OJc_Q">https://www.youtube.com/watch?v=Fbml7OJc_Q</a><br><a href="https://www.youtube.com/watch?v=LZ_DT8LDf_E">https://www.youtube.com/watch?v=LZ_DT8LDf_E</a>                             |
|  |                       | 2 Finals (1M+1F)         | 3 (1M+2F)  | <a href="https://www.youtube.com/watch?v=nlrU6cjs5l8">https://www.youtube.com/watch?v=nlrU6cjs5l8</a>                                                                                                                                    |
|  | WPT Zaragoza Open     | 5 Quarter Finals (3M+2F) | 10 (6M+4F) | <a href="https://www.youtube.com/watch?v=u1wN1bOJIIs">https://www.youtube.com/watch?v=u1wN1bOJIIs</a><br><a href="https://www.youtube.com/watch?v=ffPKws8Shis">https://www.youtube.com/watch?v=ffPKws8Shis</a>                           |
|  |                       | 4 Semi Finals (2M+2F)    | 9 (5M+4F)  | <a href="https://www.youtube.com/watch?v=mmPPx94iWQ0&amp;t=13057s">https://www.youtube.com/watch?v=mmPPx94iWQ0&amp;t=13057s</a><br><a href="https://www.youtube.com/watch?v=GTDBn_U5deA">https://www.youtube.com/watch?v=GTDBn_U5deA</a> |
|  |                       | 2 Finals (1M+1F)         | 5 (2M+3F)  | <a href="https://www.youtube.com/watch?v=1sUa--gttHM">https://www.youtube.com/watch?v=1sUa--gttHM</a>                                                                                                                                    |

|      |                       |                          |              |                                                                                                                                                                                                                                                                    |
|------|-----------------------|--------------------------|--------------|--------------------------------------------------------------------------------------------------------------------------------------------------------------------------------------------------------------------------------------------------------------------|
|      | WPT Keler Bilbao Open | 6 Quarter Finals (4M+2F) | 13 (9M+4F)   | <a href="https://www.youtube.com/watch?v=Ti2rIiG6NY8">https://www.youtube.com/watch?v=Ti2rIiG6NY8</a><br><a href="https://www.youtube.com/watch?v=_D0wO5NyI3k">https://www.youtube.com/watch?v=_D0wO5NyI3k</a>                                                     |
|      |                       | 4 Semi Finals (2M+2F)    | 6 (4M+2F)    | <a href="https://www.youtube.com/watch?v=XDtyoeq_uKc">https://www.youtube.com/watch?v=XDtyoeq_uKc</a><br><a href="https://www.youtube.com/watch?v=qdQV3REGTPk">https://www.youtube.com/watch?v=qdQV3REGTPk</a>                                                     |
|      |                       | 2 Finals (1M+1F)         | 4 (2M+2F)    | <a href="https://www.youtube.com/watch?v=m6LNXgoqwKw&amp;t=15590s">https://www.youtube.com/watch?v=m6LNXgoqwKw&amp;t=15590s</a>                                                                                                                                    |
|      | WPT Master Final      | 8 Quarter Finals (4M+4F) | 20 (10M+10F) | <a href="https://www.youtube.com/watch?v=9MuvFaXSw5U">https://www.youtube.com/watch?v=9MuvFaXSw5U</a><br><a href="https://www.youtube.com/watch?v=xBEDy-ions0">https://www.youtube.com/watch?v=xBEDy-ions0</a>                                                     |
|      |                       | 4 Semi Finals (2M+2F)    | 8 (4M+4F)    | <a href="https://www.youtube.com/watch?v=FCBnI6gek8M">https://www.youtube.com/watch?v=FCBnI6gek8M</a><br><a href="https://www.youtube.com/watch?v=SpFd0US9EHc">https://www.youtube.com/watch?v=SpFd0US9EHc</a>                                                     |
|      |                       | 2 Finals (1M+1F)         | 4 (2M+2F)    | <a href="https://www.youtube.com/watch?v=SKiqZ43k9wA&amp;t=13034s">https://www.youtube.com/watch?v=SKiqZ43k9wA&amp;t=13034s</a>                                                                                                                                    |
| 2018 | WPT Zaragoza Open     | 5 Quarter Finals (4M+1F) | 12 (10M+2F)  | <a href="https://www.youtube.com/watch?v=YxFtlWQIPvI">https://www.youtube.com/watch?v=YxFtlWQIPvI</a><br><a href="https://www.youtube.com/watch?v=0Pm3_9hfqxY&amp;t=2321s">https://www.youtube.com/watch?v=0Pm3_9hfqxY&amp;t=2321s</a>                             |
|      |                       | 3 Semi Finals (1M+2F)    | 8 (2M+6F)    | <a href="https://www.youtube.com/watch?v=JHwkLCDBgAQ&amp;t=10190s">https://www.youtube.com/watch?v=JHwkLCDBgAQ&amp;t=10190s</a><br><a href="https://www.youtube.com/watch?v=aPv0gAmMILM&amp;t=12909s">https://www.youtube.com/watch?v=aPv0gAmMILM&amp;t=12909s</a> |
|      |                       | 2 Finals (1M+1F)         | 4 (2M+2F)    | <a href="https://www.youtube.com/watch?v=W3WOgBRs-VA">https://www.youtube.com/watch?v=W3WOgBRs-VA</a>                                                                                                                                                              |
|      | WPT Jaen Open         | 6 Quarter Finals (4M+2F) | 13 (9M+4F)   | <a href="https://www.youtube.com/watch?v=jGmq4aoU0rY">https://www.youtube.com/watch?v=jGmq4aoU0rY</a><br><a href="https://www.youtube.com/watch?v=KVl48_1SU64">https://www.youtube.com/watch?v=KVl48_1SU64</a>                                                     |
|      |                       | 3 Semi Finals (1M+2F)    | 5 (1M+4F)    | <a href="https://www.youtube.com/watch?v=UwyYaCY3yjM">https://www.youtube.com/watch?v=UwyYaCY3yjM</a><br><a href="https://www.youtube.com/watch?v=vegiY1mGm2s">https://www.youtube.com/watch?v=vegiY1mGm2s</a>                                                     |
|      |                       | 2 Finals (1M+1F)         | 4 (2M+2F)    | <a href="https://www.youtube.com/watch?v=d-vC_pIJLoU">https://www.youtube.com/watch?v=d-vC_pIJLoU</a>                                                                                                                                                              |
|      | WPT Valladolid Open   | 6 Quarter Finals (4M+2F) | 10 (6M+4F)   | <a href="https://www.youtube.com/watch?v=97J6Nj4AGnU">https://www.youtube.com/watch?v=97J6Nj4AGnU</a><br><a href="https://www.youtube.com/watch?v=T46c3ilAH1E&amp;t=39318s">https://www.youtube.com/watch?v=T46c3ilAH1E&amp;t=39318s</a>                           |
|      |                       | 4 Semi Finals (2M+2F)    | 7 (3M+4F)    | <a href="https://www.youtube.com/watch?v=5y9pqbyY67Z0">https://www.youtube.com/watch?v=5y9pqbyY67Z0</a><br><a href="https://www.youtube.com/watch?v=5hrrhGXIdoQ">https://www.youtube.com/watch?v=5hrrhGXIdoQ</a>                                                   |
|      |                       | 2 Finals (1M+1F)         | 6 (3M+3F)    | <a href="https://www.youtube.com/watch?v=gUO06leaNBQ">https://www.youtube.com/watch?v=gUO06leaNBQ</a>                                                                                                                                                              |
|      | WPT Valencia Master   | 5 Quarter Finals (3M+2F) | 10 (6M+4F)   | <a href="https://www.youtube.com/watch?v=n97kEUwlfps">https://www.youtube.com/watch?v=n97kEUwlfps</a><br><a href="https://www.youtube.com/watch?v=FK5Qd4S_r8I">https://www.youtube.com/watch?v=FK5Qd4S_r8I</a>                                                     |
|      |                       | 4 Semi Finals (2M+2F)    | 9 (5M+4F)    | <a href="https://www.youtube.com/watch?v=p2FevN7ArM8">https://www.youtube.com/watch?v=p2FevN7ArM8</a><br><a href="https://www.youtube.com/watch?v=vVP34M90G8c">https://www.youtube.com/watch?v=vVP34M90G8c</a>                                                     |
|      |                       | 2 Finals (1M+1F)         | 4 (2M+2F)    | <a href="https://www.youtube.com/watch?v=DdtJc2C9xbg">https://www.youtube.com/watch?v=DdtJc2C9xbg</a>                                                                                                                                                              |

|  |                  |                          |            |                                                                                                                                                                                                                                                                                                                         |
|--|------------------|--------------------------|------------|-------------------------------------------------------------------------------------------------------------------------------------------------------------------------------------------------------------------------------------------------------------------------------------------------------------------------|
|  | WPT Mijas Open   | 4 Quarter Finals (3M+1F) | 7 (5M+2F)  | <a href="https://www.youtube.com/watch?v=H0LFfDaxh2E&amp;t=9319s">https://www.youtube.com/watch?v=H0LFfDaxh2E&amp;t=9319s</a><br><a href="https://www.youtube.com/watch?v=YQuWsgD0r78">https://www.youtube.com/watch?v=YQuWsgD0r78</a>                                                                                  |
|  |                  | 4 Semi Finals (2M+2F)    | 5 (2M+3F)  | <a href="https://www.youtube.com/watch?v=FkJHyCOrxo0">https://www.youtube.com/watch?v=FkJHyCOrxo0</a><br><a href="https://www.youtube.com/watch?v=ud59l0G87cE">https://www.youtube.com/watch?v=ud59l0G87cE</a>                                                                                                          |
|  |                  | 2 Finals (1M+1F)         | 4 (2M+2F)  | <a href="https://www.youtube.com/watch?v=pyzPoWSyRyA&amp;t=3557s">https://www.youtube.com/watch?v=pyzPoWSyRyA&amp;t=3557s</a>                                                                                                                                                                                           |
|  | WPT Andorra Open | 6 Quarter Finals (4M+2F) | 10 (6M+4F) | <a href="https://www.youtube.com/watch?v=BSQCjdCN4RQ">https://www.youtube.com/watch?v=BSQCjdCN4RQ</a><br><a href="https://www.youtube.com/watch?v=PZ3xte6gWYA">https://www.youtube.com/watch?v=PZ3xte6gWYA</a>                                                                                                          |
|  |                  | 4 Semi Finals (2M+2F)    | 8 (4M+4F)  | <a href="https://www.youtube.com/watch?v=PDZjiBrNzb8">https://www.youtube.com/watch?v=PDZjiBrNzb8</a><br><a href="https://www.youtube.com/watch?v=JVf5gm_VERM">https://www.youtube.com/watch?v=JVf5gm_VERM</a>                                                                                                          |
|  |                  | 2 Finals (1M+1F)         | 4 (3M+1F)  | <a href="https://www.youtube.com/watch?v=A7vhS56cBs4&amp;t=19422s">https://www.youtube.com/watch?v=A7vhS56cBs4&amp;t=19422s</a>                                                                                                                                                                                         |
|  | WPT Lugo Open    | 6 Quarter Finals (4M+2F) | 11 (8M+3F) | <a href="https://www.youtube.com/watch?v=vdANHmukYvA">https://www.youtube.com/watch?v=vdANHmukYvA</a><br><a href="https://www.youtube.com/watch?v=hLROJPyeqL0">https://www.youtube.com/watch?v=hLROJPyeqL0</a>                                                                                                          |
|  |                  | 3 Semi Finals (1M+2F)    | 5 (1M+4F)  | <a href="https://www.youtube.com/watch?v=ABPU0ngy_AQ">https://www.youtube.com/watch?v=ABPU0ngy_AQ</a><br><a href="https://www.youtube.com/watch?v=Ie6nJww0VtA">https://www.youtube.com/watch?v=Ie6nJww0VtA</a>                                                                                                          |
|  |                  | 2 Finals (1M+1F)         | 4 (2M+2F)  | <a href="https://www.youtube.com/watch?v=zoYhi4_xSRA">https://www.youtube.com/watch?v=zoYhi4_xSRA</a>                                                                                                                                                                                                                   |
|  | WPT Granada Open | 6 Quarter Finals (4M+2F) | 11 (7M+4F) | <a href="https://www.youtube.com/watch?v=Y0sHtlm3Hfk">https://www.youtube.com/watch?v=Y0sHtlm3Hfk</a><br><a href="https://www.youtube.com/watch?v=ZZmDfSEBIIdY">https://www.youtube.com/watch?v=ZZmDfSEBIIdY</a>                                                                                                        |
|  |                  | 4 Semi Finals (2M+2F)    | 8 (4M+4F)  | <a href="https://www.youtube.com/watch?v=W4uTRmTwCNo">https://www.youtube.com/watch?v=W4uTRmTwCNo</a><br><a href="https://www.youtube.com/watch?v=MN7zZkws2f0">https://www.youtube.com/watch?v=MN7zZkws2f0</a>                                                                                                          |
|  |                  | 2 Finals (1M+1F)         | 3 (1M+2F)  | <a href="https://www.youtube.com/watch?v=fmsDg_cRIkw">https://www.youtube.com/watch?v=fmsDg_cRIkw</a>                                                                                                                                                                                                                   |
|  | WPT Bilbao Open  | 6 Quarter Finals (4M+2F) | 12 (8M+4F) | <a href="https://www.youtube.com/watch?v=Bx8sg8KmB7g">https://www.youtube.com/watch?v=Bx8sg8KmB7g</a><br><a href="https://www.youtube.com/watch?v=nMps3X8qIM0">https://www.youtube.com/watch?v=nMps3X8qIM0</a>                                                                                                          |
|  |                  | 4 Semi Finals (2M+2F)    | 8 (4M+4F)  | <a href="https://www.youtube.com/watch?v=ybaZJKVzp10">https://www.youtube.com/watch?v=ybaZJKVzp10</a><br><a href="https://www.youtube.com/watch?v=hxm4p4rzo1Y">https://www.youtube.com/watch?v=hxm4p4rzo1Y</a>                                                                                                          |
|  |                  | 2 Finals (1M+1F)         | 5 (2M+3F)  | <a href="https://www.youtube.com/watch?v=wu3Tzx3xsfU">https://www.youtube.com/watch?v=wu3Tzx3xsfU</a>                                                                                                                                                                                                                   |
|  | WPT Murcia Open  | 5 Quarter Finals (3M+2F) | 10 (7M+3F) | <a href="https://www.youtube.com/watch?v=IUK9RnqPOHA">https://www.youtube.com/watch?v=IUK9RnqPOHA</a><br><a href="https://www.youtube.com/watch?v=MPJw-RIJVag">https://www.youtube.com/watch?v=MPJw-RIJVag</a>                                                                                                          |
|  |                  | 4 Semi Finals (2M+2F)    | 7 (4M+3F)  | <a href="https://www.youtube.com/watch?v=F1ZVX-6UeLg">https://www.youtube.com/watch?v=F1ZVX-6UeLg</a><br><a href="https://www.youtube.com/watch?v=iEnfWrNmVS4">https://www.youtube.com/watch?v=iEnfWrNmVS4</a><br><a href="https://www.youtube.com/watch?v=kYIGz30TRBM">https://www.youtube.com/watch?v=kYIGz30TRBM</a> |

|      |                     |                          |             |                                                                                                                                                                                                                                                                                                                                                                                                                                  |
|------|---------------------|--------------------------|-------------|----------------------------------------------------------------------------------------------------------------------------------------------------------------------------------------------------------------------------------------------------------------------------------------------------------------------------------------------------------------------------------------------------------------------------------|
|      | WPT Master Final    | 2 Finals (1M+1F)         | 6 (3M+3F)   | <a href="https://www.youtube.com/watch?v=Met3C8H5Sw0">https://www.youtube.com/watch?v=Met3C8H5Sw0</a>                                                                                                                                                                                                                                                                                                                            |
|      |                     | 8 Quarter Finals (4M+4F) | 14 (7M+7F)  | <a href="https://www.youtube.com/watch?v=phwYUM7UNrU">https://www.youtube.com/watch?v=phwYUM7UNrU</a><br><a href="https://www.youtube.com/watch?v=-zXjg-G8UzA">https://www.youtube.com/watch?v=-zXjg-G8UzA</a><br><a href="https://www.youtube.com/watch?v=euG2AloDuAQ">https://www.youtube.com/watch?v=euG2AloDuAQ</a><br><a href="https://www.youtube.com/watch?v=f0m__zeqWuo">https://www.youtube.com/watch?v=f0m__zeqWuo</a> |
|      |                     | 4 Semi Finals (2M+2F)    | 6 (2M+4F)   | <a href="https://www.youtube.com/watch?v=2K6cfnP4Ee0">https://www.youtube.com/watch?v=2K6cfnP4Ee0</a><br><a href="https://www.youtube.com/watch?v=Q6OvKNpl3LI">https://www.youtube.com/watch?v=Q6OvKNpl3LI</a>                                                                                                                                                                                                                   |
|      |                     | 2 Finals (1M+1F)         | 3 (1M+2F)   | <a href="https://www.youtube.com/watch?v=gZfPmQZ0HNk&amp;t=14701s">https://www.youtube.com/watch?v=gZfPmQZ0HNk&amp;t=14701s</a>                                                                                                                                                                                                                                                                                                  |
| 2019 | WPT Marbella Master | 3 Quarter Finals (1M+2F) | 7 (2M+5F)   | <a href="https://www.youtube.com/watch?v=_9PR9dvGQ60&amp;t=16319s">https://www.youtube.com/watch?v=_9PR9dvGQ60&amp;t=16319s</a><br><a href="https://www.youtube.com/watch?v=F1aCqoIwFUw&amp;t=11846s">https://www.youtube.com/watch?v=F1aCqoIwFUw&amp;t=11846s</a>                                                                                                                                                               |
|      |                     | 4 Semi Finals (2M+2F)    | 8 (5M+3F)   | <a href="https://www.youtube.com/watch?v=ch4BDLBKUNE">https://www.youtube.com/watch?v=ch4BDLBKUNE</a><br><a href="https://www.youtube.com/watch?v=zJZof_bzirs">https://www.youtube.com/watch?v=zJZof_bzirs</a>                                                                                                                                                                                                                   |
|      |                     | 2 Finals (1M+1F)         | 4 (1M+3F)   | <a href="https://www.youtube.com/watch?v=dMhiMrC3vbk&amp;t=12867s">https://www.youtube.com/watch?v=dMhiMrC3vbk&amp;t=12867s</a>                                                                                                                                                                                                                                                                                                  |
|      | WPT Logroño Open    | 6 Quarter Finals (4M+2F) | 14 (10M+4F) | <a href="https://www.youtube.com/watch?v=89ZmHbrMocE">https://www.youtube.com/watch?v=89ZmHbrMocE</a><br><a href="https://www.youtube.com/watch?v=knkOAuU891U&amp;t=9395s">https://www.youtube.com/watch?v=knkOAuU891U&amp;t=9395s</a>                                                                                                                                                                                           |
|      |                     | 4 Semi Finals (2M+2F)    | 8 (3M+5F)   | <a href="https://www.youtube.com/watch?v=V89fIXBG-fY">https://www.youtube.com/watch?v=V89fIXBG-fY</a><br><a href="https://www.youtube.com/watch?v=0CeHls5sb78">https://www.youtube.com/watch?v=0CeHls5sb78</a>                                                                                                                                                                                                                   |
|      |                     | 1 Final (1F)             | 3 (3F)      | <a href="https://www.youtube.com/watch?v=qo46tPoYgPc&amp;t=19166s">https://www.youtube.com/watch?v=qo46tPoYgPc&amp;t=19166s</a>                                                                                                                                                                                                                                                                                                  |
|      | WPT Alicante Open   | 5 Quarter Finals (4M+1F) | 12 (9M+3F)  | <a href="https://www.youtube.com/watch?v=t9QUYTG8VEk">https://www.youtube.com/watch?v=t9QUYTG8VEk</a><br><a href="https://www.youtube.com/watch?v=NXI1cKuhJGQ">https://www.youtube.com/watch?v=NXI1cKuhJGQ</a>                                                                                                                                                                                                                   |
|      |                     | 4 Semi Finals (2M+2F)    | 11 (6M+5F)  | <a href="https://www.youtube.com/watch?v=G--BwdUMKNE&amp;t=1282s">https://www.youtube.com/watch?v=G--BwdUMKNE&amp;t=1282s</a><br><a href="https://www.youtube.com/watch?v=2f4fOldWje4&amp;t=8447s">https://www.youtube.com/watch?v=2f4fOldWje4&amp;t=8447s</a>                                                                                                                                                                   |
|      |                     | 2 Finals (1M+1F)         | 4 (2M+2F)   | <a href="https://www.youtube.com/watch?v=PW8MTUbTcYg&amp;t=6825s">https://www.youtube.com/watch?v=PW8MTUbTcYg&amp;t=6825s</a>                                                                                                                                                                                                                                                                                                    |
|      | WPT Vigo Open       | 5 Quarter Finals (3M+2F) | 10 (6M+4F)  | <a href="https://www.youtube.com/watch?v=was4EG4fXLI&amp;t=5787s">https://www.youtube.com/watch?v=was4EG4fXLI&amp;t=5787s</a><br><a href="https://www.youtube.com/watch?v=a_iHLCNUC4c&amp;t=9809s">https://www.youtube.com/watch?v=a_iHLCNUC4c&amp;t=9809s</a>                                                                                                                                                                   |
|      |                     | 3 Semi Finals (2M+1F)    | 5 (3M+2F)   | <a href="https://www.youtube.com/watch?v=RpLn2gohH88&amp;t=10414s">https://www.youtube.com/watch?v=RpLn2gohH88&amp;t=10414s</a><br><a href="https://www.youtube.com/watch?v=AxNyq8S77no">https://www.youtube.com/watch?v=AxNyq8S77no</a>                                                                                                                                                                                         |
|      |                     | 2 Finals (1M+1F)         | 4 (2M+2F)   | <a href="https://www.youtube.com/watch?v=O4k7CLvxuos&amp;t=5487s">https://www.youtube.com/watch?v=O4k7CLvxuos&amp;t=5487s</a>                                                                                                                                                                                                                                                                                                    |
|      | WPT Jaen Open       | 6 Quarter Finals (4M+2F) | 11 (7M+4F)  | <a href="https://www.youtube.com/watch?v=YuW613nDRzY">https://www.youtube.com/watch?v=YuW613nDRzY</a><br><a href="https://www.youtube.com/watch?v=5BRPIUK66CA">https://www.youtube.com/watch?v=5BRPIUK66CA</a>                                                                                                                                                                                                                   |

|  |                       |                          |            |                                                                                                                                                                                                                                          |
|--|-----------------------|--------------------------|------------|------------------------------------------------------------------------------------------------------------------------------------------------------------------------------------------------------------------------------------------|
|  |                       | 4 Semi Finals (2M+2F)    | 9 (3M+6F)  | <a href="https://www.youtube.com/watch?v=XSRHn0QO0Kc">https://www.youtube.com/watch?v=XSRHn0QO0Kc</a><br><a href="https://www.youtube.com/watch?v=bDlfUcA-X1Q">https://www.youtube.com/watch?v=bDlfUcA-X1Q</a>                           |
|  |                       | 2 Finals (1M+1F)         | 5 (2M+3F)  | <a href="https://www.youtube.com/watch?v=gnvK_1l-pcA">https://www.youtube.com/watch?v=gnvK_1l-pcA</a>                                                                                                                                    |
|  |                       | 6 Quarter Finals (4M+2F) | 14 (8M+6F) | <a href="https://www.youtube.com/watch?v=Oh4mD_cgPQc">https://www.youtube.com/watch?v=Oh4mD_cgPQc</a><br><a href="https://www.youtube.com/watch?v=ICIS1OIHWPk">https://www.youtube.com/watch?v=ICIS1OIHWPk</a>                           |
|  | WPT Valladolid Master | 4 Semi Finals (2M+2F)    | 7 (4M+3F)  | <a href="https://www.youtube.com/watch?v=DsjzvznuoX0">https://www.youtube.com/watch?v=DsjzvznuoX0</a><br><a href="https://www.youtube.com/watch?v=UlvTiT5ZRJM">https://www.youtube.com/watch?v=UlvTiT5ZRJM</a>                           |
|  |                       | 2 Finals (1M+1F)         | 5 (2M+3F)  | <a href="https://www.youtube.com/watch?v=xBU0IjwS7fi&amp;t=18080s">https://www.youtube.com/watch?v=xBU0IjwS7fi&amp;t=18080s</a>                                                                                                          |
|  |                       | 6 Quarter Finals (4M+2F) | 13 (8M+5F) | <a href="https://www.youtube.com/watch?v=rvnMAp09aXI">https://www.youtube.com/watch?v=rvnMAp09aXI</a><br><a href="https://www.youtube.com/watch?v=AVITTcATgYs">https://www.youtube.com/watch?v=AVITTcATgYs</a>                           |
|  | WPT Valencia Open     | 4 Semi Finals (2M+2F)    | 10 (5M+5F) | <a href="https://www.youtube.com/watch?v=14rhring75U">https://www.youtube.com/watch?v=14rhring75U</a><br><a href="https://www.youtube.com/watch?v=280bk4iRHG8">https://www.youtube.com/watch?v=280bk4iRHG8</a>                           |
|  |                       | 2 Finals (1M+1F)         | 4 (2M+2F)  | <a href="https://www.youtube.com/watch?v=w-mnb_uIe7o&amp;t=17449s">https://www.youtube.com/watch?v=w-mnb_uIe7o&amp;t=17449s</a>                                                                                                          |
|  |                       | 6 Quarter Finals (4M+2F) | 12 (8M+4F) | <a href="https://www.youtube.com/watch?v=4V-VD2t6_Gk">https://www.youtube.com/watch?v=4V-VD2t6_Gk</a><br><a href="https://www.youtube.com/watch?v=f7C1gyauZdc">https://www.youtube.com/watch?v=f7C1gyauZdc</a>                           |
|  | WPT Mijas Open        | 4 Semi Finals (2M+2F)    | 7 (3M+4F)  | <a href="https://www.youtube.com/watch?v=fRcUggTa8g4">https://www.youtube.com/watch?v=fRcUggTa8g4</a><br><a href="https://www.youtube.com/watch?v=_OPyKMmXAe0">https://www.youtube.com/watch?v=_OPyKMmXAe0</a>                           |
|  |                       | 2 Finals (1M+1F)         | 3 (1M+2F)  | <a href="https://www.youtube.com/watch?v=TUCW727mjNU&amp;t=12684s">https://www.youtube.com/watch?v=TUCW727mjNU&amp;t=12684s</a>                                                                                                          |
|  |                       | 6 Quarter Finals (4M+2F) | 11 (8M+3F) | <a href="https://www.youtube.com/watch?v=ksCXy6_9y2A&amp;t=18993s">https://www.youtube.com/watch?v=ksCXy6_9y2A&amp;t=18993s</a><br><a href="https://www.youtube.com/watch?v=U2RJBZRBNeg">https://www.youtube.com/watch?v=U2RJBZRBNeg</a> |
|  | WPT Madrid Master     | 3 Semi Finals (1M+2F)    | 5 (1M+4F)  | <a href="https://www.youtube.com/watch?v=Pgky3PW5KJ8">https://www.youtube.com/watch?v=Pgky3PW5KJ8</a><br><a href="https://www.youtube.com/watch?v=ruQ96lxyeCU&amp;t=6946s">https://www.youtube.com/watch?v=ruQ96lxyeCU&amp;t=6946s</a>   |
|  |                       | 2 Finals (1M+1F)         | 4 (2M+2F)  | <a href="https://www.youtube.com/watch?v=xv98LmUTtCM&amp;t=12940s">https://www.youtube.com/watch?v=xv98LmUTtCM&amp;t=12940s</a>                                                                                                          |
|  |                       | 5 Quarter Finals (4M+1F) | 11 (9M+2F) | <a href="https://www.youtube.com/watch?v=-mBHziRNtA0">https://www.youtube.com/watch?v=-mBHziRNtA0</a><br><a href="https://www.youtube.com/watch?v=s3J9vheFH1s">https://www.youtube.com/watch?v=s3J9vheFH1s</a>                           |
|  | WPT Menorca Open      | 4 Semi Finals (2M+2F)    | 9 (4M+5F)  | <a href="https://www.youtube.com/watch?v=8IjNfn86t_k">https://www.youtube.com/watch?v=8IjNfn86t_k</a><br><a href="https://www.youtube.com/watch?v=NXVm7PJHn9k">https://www.youtube.com/watch?v=NXVm7PJHn9k</a>                           |
|  |                       | 2 Finals (1M+1F)         | 4 (2M+2F)  | <a href="https://www.youtube.com/watch?v=ASCE6OX_QaM&amp;t=18562s">https://www.youtube.com/watch?v=ASCE6OX_QaM&amp;t=18562s</a>                                                                                                          |
|  |                       | 6 Quarter Finals (4M+2F) | 10 (8M+2F) | <a href="https://www.youtube.com/watch?v=Ypb7Lea2yyE">https://www.youtube.com/watch?v=Ypb7Lea2yyE</a><br><a href="https://www.youtube.com/watch?v=h8tiqJNJRVo">https://www.youtube.com/watch?v=h8tiqJNJRVo</a>                           |



|  |                  |                          |            |                                                                                                                                                                                                                                                                                                                                                                                                                                  |
|--|------------------|--------------------------|------------|----------------------------------------------------------------------------------------------------------------------------------------------------------------------------------------------------------------------------------------------------------------------------------------------------------------------------------------------------------------------------------------------------------------------------------|
|  |                  | 4 Semi Finals (2M+2F)    | 8 (4M+4F)  | <a href="https://www.youtube.com/watch?v=UYdknaybsjI">https://www.youtube.com/watch?v=UYdknaybsjI</a><br><a href="https://www.youtube.com/watch?v=pQMI7Nih4QA">https://www.youtube.com/watch?v=pQMI7Nih4QA</a>                                                                                                                                                                                                                   |
|  |                  | 2 Finals (1M+1F)         | 4 (2M+2F)  | <a href="https://www.youtube.com/watch?v=FtWp6BatpkI&amp;t=11714s">https://www.youtube.com/watch?v=FtWp6BatpkI&amp;t=11714s</a>                                                                                                                                                                                                                                                                                                  |
|  | WPT Master Final | 8 Quarter Finals (4M+4F) | 16 (8M+8F) | <a href="https://www.youtube.com/watch?v=JYrxzHo_7q4">https://www.youtube.com/watch?v=JYrxzHo_7q4</a><br><a href="https://www.youtube.com/watch?v=b4WtrxSNXwU">https://www.youtube.com/watch?v=b4WtrxSNXwU</a><br><a href="https://www.youtube.com/watch?v=4Kz-ybtsgT4">https://www.youtube.com/watch?v=4Kz-ybtsgT4</a><br><a href="https://www.youtube.com/watch?v=paQgLd7Ll-A">https://www.youtube.com/watch?v=paQgLd7Ll-A</a> |
|  |                  | 4 Semi Finals (2M+2F)    | 9 (5M+4F)  | <a href="https://www.youtube.com/watch?v=xIFlyqspOHo&amp;t=9161s">https://www.youtube.com/watch?v=xIFlyqspOHo&amp;t=9161s</a><br><a href="https://www.youtube.com/watch?v=z_dIJFUrOds&amp;t=15528s">https://www.youtube.com/watch?v=z_dIJFUrOds&amp;t=15528s</a>                                                                                                                                                                 |
|  |                  | 2 Finals (1M+1F)         | 3 (1M+2F)  | <a href="https://www.youtube.com/watch?v=zx_mc1Ingqg&amp;t=19622s">https://www.youtube.com/watch?v=zx_mc1Ingqg&amp;t=19622s</a>                                                                                                                                                                                                                                                                                                  |
|  |                  |                          |            |                                                                                                                                                                                                                                                                                                                                                                                                                                  |
